# Supplementary material for: Abundance Is Not Enough: The Need for Multiple Lines of Evidence in Testing for Ecological Stability in the Fossil Record
Source: PLoS One. 2013 May 15;8(5):e63071. doi: 10.1371/journal.pone.0063071 (PMC3655006; doi:10.1371/journal.pone.0063071)
Supplement: Table S1 — Relative abundance by taxon and stratigraphic unit. (XLSX) [file pone.0063071.s002.xlsx]

## Sheet: Sheet1
	AC	AV	PT	LE
Giv-1C	15.3	5.1	71.2	8.5
Giv-1B	63.8	5.5	25.6	5.2
Giv-1A	43.4	2.6	51.3	2.6
AV=Pseudaviculopecten
PT=Ptychopteria
LE=Leptodesma
AC=Actinopteria
Stratigraphic units Giv-1A through C follow [22]
