# Supplementary material for: Abundance Is Not Enough: The Need for Multiple Lines of Evidence in Testing for Ecological Stability in the Fossil Record
Source: PLoS One. 2013 May 15;8(5):e63071. doi: 10.1371/journal.pone.0063071 (PMC3655006; doi:10.1371/journal.pone.0063071)
Supplement: Table S2 — Average size of specimens by taxon and stratigraphic unit. (XLSX) [file pone.0063071.s003.xlsx]

## Sheet: Sheet1
	AC	AV	PT	LE
Giv-1C	27.9	33.3	35.8	29.4
Giv-1B	25.3	29.7	32.5	33.8
Giv-1A	24.8	34.5	35.4	40
AV=Pseudaviculopecten
PT=Ptychopteria
LE=Leptodesma
AC=Actinopteria
Stratigraphic units Giv-1A through C follow [22]
