# Supplementary material for: Abundance Is Not Enough: The Need for Multiple Lines of Evidence in Testing for Ecological Stability in the Fossil Record
Source: PLoS One. 2013 May 15;8(5):e63071. doi: 10.1371/journal.pone.0063071 (PMC3655006; doi:10.1371/journal.pone.0063071)
Supplement: Table S3 — Repair frequency by taxon and stratigraphic unit. (XLSX) [file pone.0063071.s004.xlsx]

## Sheet: Sheet1
	AC	AV	PT	LE
Giv-1C	10	10	80	0
Giv-1B	66	3.4	28.4	2.3
Giv-1A	50	7.1	42.9	0
AV=Pseudaviculopecten
PT=Ptychopteria
LE=Leptodesma
AC=Actinopteria
Stratigraphic units Giv-1A through C follow [22]
